# Supplementary material for: Voice of People with Fragile X Syndrome and Their Families: Reports from a Survey on Treatment Priorities
Source: MDPI journal article supplement (doi:10.3390/brainsci9020018), 2019-01-23
Supplement: s1 [file s1]

## Supplementary Tables

**Table S1.** Percent ranked first and weighted rank score by sex and age group for this question: Rank these three areas from one to three to the extent it affects the person’s daily life—with one having the greatest impact and three having the least impact. (Primary Concerns).

| Q1 Primary Concerns | Sex/Age Group | Percent Ranked “1st” | Weighted Rank Score |     |
|---------------------|---------------|----------------------|---------------------|-----|
| Behavior            | Male          | 0-5                  | 53.2                | 2.3 |
|                     |               | 6-12                 | 60.9                | 2.5 |
|                     |               | 13-21                | 52.2                | 2.3 |
|                     |               | 22+                  | 44.8                | 2.1 |
|                     | Female        | 0-5                  | 80                  | 2.8 |
|                     |               | 6-12                 | 36.4                | 2.3 |
|                     |               | 13-21                | 27.6                | 1.9 |
|                     |               | 22+                  | 30                  | 1.9 |
| Intelligence        | Male          | 0-5                  | 31.9                | 2.2 |
|                     |               | 6-12                 | 31.5                | 2.1 |
|                     |               | 13-21                | 38.9                | 2.2 |
|                     |               | 22+                  | 40.8                | 2.1 |
|                     | Female        | 0-5                  | 20                  | 2.2 |
|                     |               | 6-12                 | 63.6                | 2.5 |
|                     |               | 13-21                | 65.5                | 2.6 |
|                     |               | 22+                  | 55.6                | 2.3 |
| Physical            | Male          | 0-5                  | 14.9                | 1.5 |
|                     |               | 6-12                 | 6.5                 | 1.3 |
|                     |               | 13-21                | 8.0                 | 1.3 |
|                     |               | 22+                  | 6.4                 | 1.2 |
|                     | Female        | 0-5                  | 0                   | 0.8 |
|                     |               | 6-12                 | 0                   | 1.2 |
|                     |               | 13-21                | 6.9                 | 1.5 |
|                     |               | 22+                  | 11.1                | 1.3 |

Shading indicates highest percent and highest weighted rank score per sex and age group.

**Table S2.** Percent ranked first and weighted rank score by sex and age group for Question: Check the five characteristics that have the greatest impact on the life of the person with FXS. Prioritize 1, 2, 3, 4, 5. (Problematic Symptoms).

| Q2 Problematic Symptoms | Sex/Age Group | Percent Ranked 1st | Mean Weighted Rank Score |      |
|-------------------------|---------------|--------------------|--------------------------|------|
| Anxiety                 | Male          | 0-5                | 17.0                     | 1.43 |
|                         |               | 6-12               | 35.9                     | 2.97 |
|                         |               | 13-21              | 32.7                     | 2.73 |
|                         |               | 22+                | 43.2                     | 3.04 |
|                         | Female        | 0-5                | 36.4                     | 0.4  |
|                         |               | 6-12               | 27.6                     | 2.27 |
|                         |               | 13-21              | 27.8                     | 2.52 |
|                         |               | 22+                | 14.3                     | 2.61 |
| Learning                | Male          | 0-5                | 10.6                     | 1.53 |
|                         |               | 6-12               | 20.6                     | 2.53 |
|                         |               | 13-21              | 23.9                     | 2.40 |
|                         |               | 22+                | 13.6                     | 2.22 |
|                         | Female        | 0-5                | 36.4                     | 1.4  |
|                         |               | 6-12               | 24.1                     | 2.82 |
|                         |               | 13-21              | 27.8                     | 2.62 |
|                         |               | 22+                | 6.3                      | 2.39 |
| Expressive Language     | Male          | 0-5                | 23.4                     | 2.53 |
|                         |               | 6-12               | 14.1                     | 1.29 |
|                         |               | 13-21              | 6.2                      | 1.48 |
|                         |               | 22+                | 6.4                      | 0.96 |
|                         | Female        | 0-5                | 0                        | 1.6  |
|                         |               | 6-12               | 3.4                      | 0.55 |
|                         |               | 13-21              | 5.6                      | 0.72 |
|                         |               | 22+                | 4.8                      | 0.72 |
| Seizures                | Male          | 0-5                | 6.4                      | 0.32 |
|                         |               | 6-12               | 7.6                      | 0.48 |
|                         |               | 13-21              | 8.0                      | 0.42 |
|                         |               | 22+                | 4                        | 0.21 |
|                         | Female        | 0-5                | 9.1                      | 1    |
|                         |               | 6-12               | 10.3                     | 0.45 |
|                         |               | 13-21              | 5.6                      | 0.55 |
|                         |               | 22+                | 1.6                      | 0.44 |
| Other                   | Male          | 0-5                | 6.4                      | 0.45 |
|                         |               | 6-12               | 5.4                      | 0.36 |
|                         |               | 13-21              | 6.2                      | 0.59 |
|                         |               | 22+                | 5.6                      | 0.46 |
|                         | Female        | 0-5                | 0                        | 1    |
|                         |               | 6-12               | 13.8                     | 0    |
|                         |               | 13-21              | 0                        | 1.14 |
|                         |               | 22+                | 4.8                      | 0.28 |

Shading indicates highest percent and highest weighted rank score per sex and age group.

**Table S3.** Percent ranked first and weighted rank score by sex and age group for this question: Check the top five areas of daily life the person with FXS is most affected by. Prioritize 1, 2, 3, 4, 5. (Daily Living Skills Most Affected).

| Q3 Daily Living Skills Most Affected | Sex/Age Group | Percent Ranked 1st | Mean Weighted Rank Score |      |
|--------------------------------------|---------------|--------------------|--------------------------|------|
| Academic                             | Male          | 0-5                | 12.77                    | 1.77 |
|                                      |               | 6-12               | 32.61                    | 2.74 |
|                                      |               | 13-21              | 26.55                    | 2.50 |
|                                      |               | 22+                | 9.60                     | 1.46 |
|                                      | Female        | 0-5                | 0.00                     | 3.40 |
|                                      |               | 6-12               | 63.64                    | 4.09 |
|                                      |               | 13-21              | 27.59                    | 2.34 |
|                                      |               | 22+                | 33.33                    | 2.00 |
| Communication                        | Male          | 0-5                | 48.94                    | 3.36 |
|                                      |               | 6-12               | 16.30                    | 1.97 |
|                                      |               | 13-21              | 22.12                    | 1.88 |
|                                      |               | 22+                | 13.60                    | 1.26 |
|                                      | Female        | 0-5                | 40.00                    | 2.60 |
|                                      |               | 6-12               | 9.09                     | 1.27 |
|                                      |               | 13-21              | 13.79                    | 1.21 |
|                                      |               | 22+                | 0.00                     | 0.67 |
| Behavior Outbursts                   | Male          | 0-5                | 19.15                    | 2.49 |
|                                      |               | 6-12               | 20.65                    | 2.52 |
|                                      |               | 13-21              | 13.27                    | 1.58 |
|                                      |               | 22+                | 17.60                    | 1.51 |
|                                      | Female        | 0-5                | 20.00                    | 2.40 |
|                                      |               | 6-12               | 9.09                     | 2.55 |
|                                      |               | 13-21              | 10.34                    | 1.10 |
|                                      |               | 22+                | 5.56                     | 0.72 |
| Self Care                            | Male          | 0-5                | 6.38                     | 1.47 |
|                                      |               | 6-12               | 10.87                    | 1.62 |
|                                      |               | 13-21              | 9.73                     | 1.98 |
|                                      |               | 22+                | 8.80                     | 1.57 |
|                                      | Female        | 0-5                | 0.00                     | 2.40 |
|                                      |               | 6-12               | 0.00                     | 1.18 |
|                                      |               | 13-21              | 3.45                     | 0.66 |
|                                      |               | 22+                | 5.56                     | 0.94 |
| Independence                         | Male          | 0-5                | 0.00                     | 0.17 |
|                                      |               | 6-12               | 0.00                     | 0.18 |
|                                      |               | 13-21              | 6.19                     | 1.08 |
|                                      |               | 22+                | 16.80                    | 2.15 |
|                                      | Female        | 0-5                | 20.00                    | 1.00 |
|                                      |               | 6-12               | 0.00                     | 0.09 |
|                                      |               | 13-21              | 3.45                     | 0.86 |
|                                      |               | 22+                | 0.00                     | 0.67 |

Shading indicates highest percent and highest weighted rank score per sex and age group.

**Table S4.** Percent ranked first and weighted rank score by sex and age group for this question: Which five specific aspects of daily living with FXS are the most challenging? Prioritize 1, 2, 3, 4, 5 (Family Impact).

| Q4 Family Impact       | Sex/Age Group | Percent Ranked 1st | Mean Weighted Rank Score |      |
|------------------------|---------------|--------------------|--------------------------|------|
| Behavior Problems      | Male          | 0-5                | 29.79                    | 2.36 |
|                        |               | 6-12               | 27.17                    | 2.33 |
|                        |               | 13-21              | 19.47                    | 1.74 |
|                        |               | 22+                | 16.00                    | 1.39 |
|                        | Female        | 0-5                | 40.00                    | 2.40 |
|                        |               | 6-12               | 18.18                    | 2.27 |
|                        |               | 13-21              | 10.34                    | 0.79 |
|                        |               | 22+                | 11.11                    | 1.06 |
| Worry About Child      | Male          | 0-5                | 6.38                     | 1.23 |
|                        |               | 6-12               | 5.43                     | 0.90 |
|                        |               | 13-21              | 19.47                    | 1.88 |
|                        |               | 22+                | 18.40                    | 1.95 |
|                        | Female        | 0-5                | 0.00                     | 1.80 |
|                        |               | 6-12               | 9.09                     | 1.09 |
|                        |               | 13-21              | 34.48                    | 2.34 |
|                        |               | 22+                | 22.22                    | 1.94 |
| Staying One Step Ahead | Male          | 0-5                | 4.26                     | 0.98 |
|                        |               | 6-12               | 10.87                    | 1.45 |
|                        |               | 13-21              | 16.81                    | 1.40 |
|                        |               | 22+                | 11.20                    | 1.30 |
|                        | Female        | 0-5                | 0.00                     | 0.00 |
|                        |               | 6-12               | 9.09                     | 0.82 |
|                        |               | 13-21              | 20.69                    | 2.21 |
|                        |               | 22+                | 11.11                    | 1.06 |
| Communicating Needs    | Male          | 0-5                | 23.40                    | 1.66 |
|                        |               | 6-12               | 5.43                     | 0.88 |
|                        |               | 13-21              | 6.19                     | 0.86 |
|                        |               | 22+                | 8.00                     | 1.09 |
|                        | Female        | 0-5                | 40.00                    | 2.40 |
|                        |               | 6-12               | 0.00                     | 0.64 |
|                        |               | 13-21              | 6.90                     | 0.48 |
|                        |               | 22+                | 0.00                     | 0.17 |
| Supervision            | Male          | 0-5                | 8.51                     | 1.19 |
|                        |               | 6-12               | 9.78                     | 1.42 |
|                        |               | 13-21              | 6.19                     | 1.29 |
|                        |               | 22+                | 8.00                     | 0.93 |
|                        | Female        | 0-5                | 0.00                     | 1.00 |
|                        |               | 6-12               | 0.00                     | 0.82 |
|                        |               | 13-21              | 3.45                     | 0.52 |
|                        |               | 22+                | 0.00                     | 0.50 |

Shading indicates highest percent and highest weighted rank score per sex and age group.

**Table S5.** Percent ranked first and weighted rank score by sex and age group for this question: What are the top three aspects of Fragile X syndrome that you would like to see a drug treatment address, list in order of preference, with the most important one first. (Drug Treatment Priorities).

| Q5 Drug Treatment Priorities | Sex/Age Group | Percent Ranked 1st | Mean Weighted Rank Score |      |
|------------------------------|---------------|--------------------|--------------------------|------|
| Anxiety                      | Male          | 0-5                | 6.38                     | 0.79 |
|                              |               | 6-12               | 25.00                    | 1.32 |
|                              |               | 13-21              | 31.86                    | 1.44 |
|                              |               | 22+                | 37.60                    | 1.67 |
|                              | Female        | 0-5                | 0.00                     | 1.00 |
|                              |               | 6-12               | 27.27                    | 1.00 |
|                              |               | 13-21              | 41.38                    | 1.59 |
|                              |               | 22+                | 38.89                    | 1.67 |
| Learning                     | Male          | 0-5                | 23.40                    | 0.96 |
|                              |               | 6-12               | 22.83                    | 1.13 |
|                              |               | 13-21              | 23.89                    | 1.16 |
|                              |               | 22+                | 18.40                    | 0.86 |
|                              | Female        | 0-5                | 40.00                    | 1.20 |
|                              |               | 6-12               | 9.09                     | 0.91 |
|                              |               | 13-21              | 31.03                    | 1.55 |
|                              |               | 22+                | 22.22                    | 0.89 |
| Behavior                     | Male          | 0-5                | 12.77                    | 0.60 |
|                              |               | 6-12               | 17.39                    | 0.84 |
|                              |               | 13-21              | 16.81                    | 0.79 |
|                              |               | 22+                | 14.40                    | 0.78 |
|                              | Female        | 0-5                | 0.00                     | 0.00 |
|                              |               | 6-12               | 18.18                    | 0.91 |
|                              |               | 13-21              | 6.90                     | 0.38 |
|                              |               | 22+                | 0.00                     | 0.06 |
| Communication                | Male          | 0-5                | 23.40                    | 1.36 |
|                              |               | 6-12               | 6.52                     | 0.48 |
|                              |               | 13-21              | 7.96                     | 0.53 |
|                              |               | 22+                | 7.20                     | 0.45 |
|                              | Female        | 0-5                | 0.00                     | 0.20 |
|                              |               | 6-12               | 9.09                     | 0.82 |
|                              |               | 13-21              | 3.45                     | 0.24 |
|                              |               | 22+                | 11.11                    | 0.56 |
| ADHD                         | Male          | 0-5                | 12.77                    | 0.57 |
|                              |               | 6-12               | 8.70                     | 0.66 |
|                              |               | 13-21              | 8.85                     | 0.60 |
|                              |               | 22+                | 2.40                     | 0.28 |
|                              | Female        | 0-5                | 20.00                    | 1.20 |
|                              |               | 6-12               | 27.27                    | 0.82 |
|                              |               | 13-21              | 0.00                     | 0.45 |
|                              |               | 22+                | 16.67                    | 0.72 |

Shading indicates highest percent and highest weighted rank score per sex and age group.
